# Supplementary material
Source: PubMed Central journal article supplement (PMC5118983)
Supplement: AAC.01428-16_zac012165720so1.pdf [file AAC.01428-16_zac012165720so1.pdf]

Supplemental Figure S1. Structures of GRL-0739, -04810, and -05010

GRL-0739

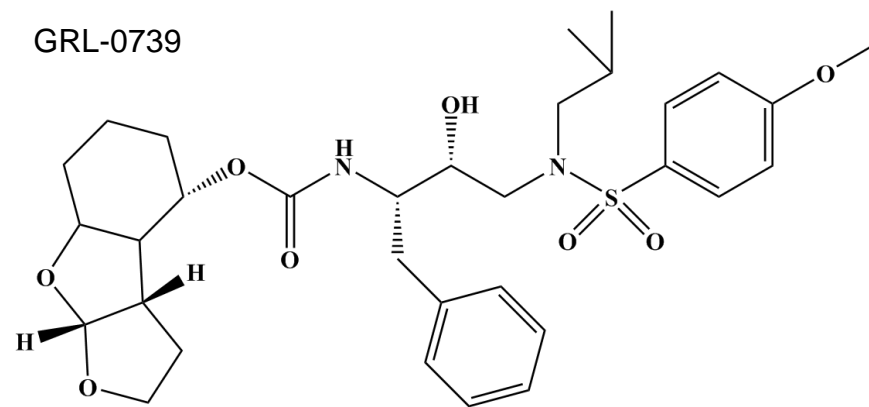

M.W. : 616.8

Cyclohexyl-*bis*-THF

GRL-04810

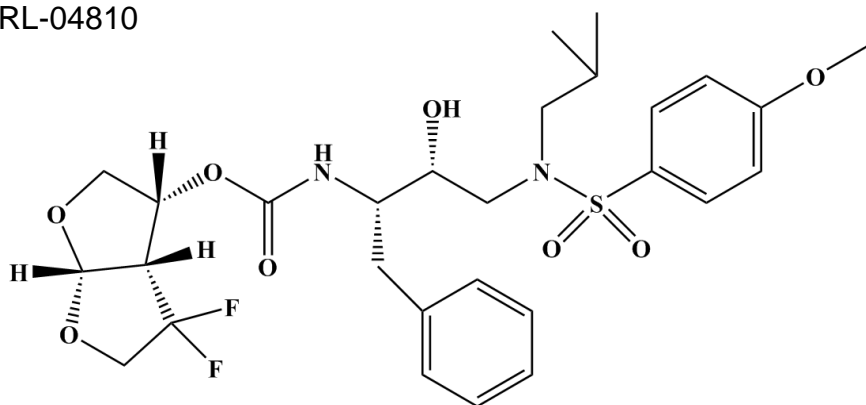

M.W. : 598.7

GRL-05010

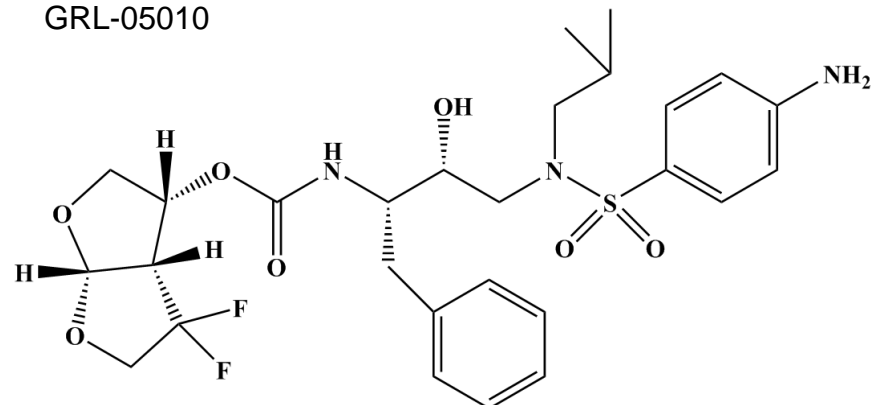

M.W. : 583.7

Supplemental Figure S2. Locations of amino acid substitution accumulated in protease in the presence of increasing concentrations of GRL-10413

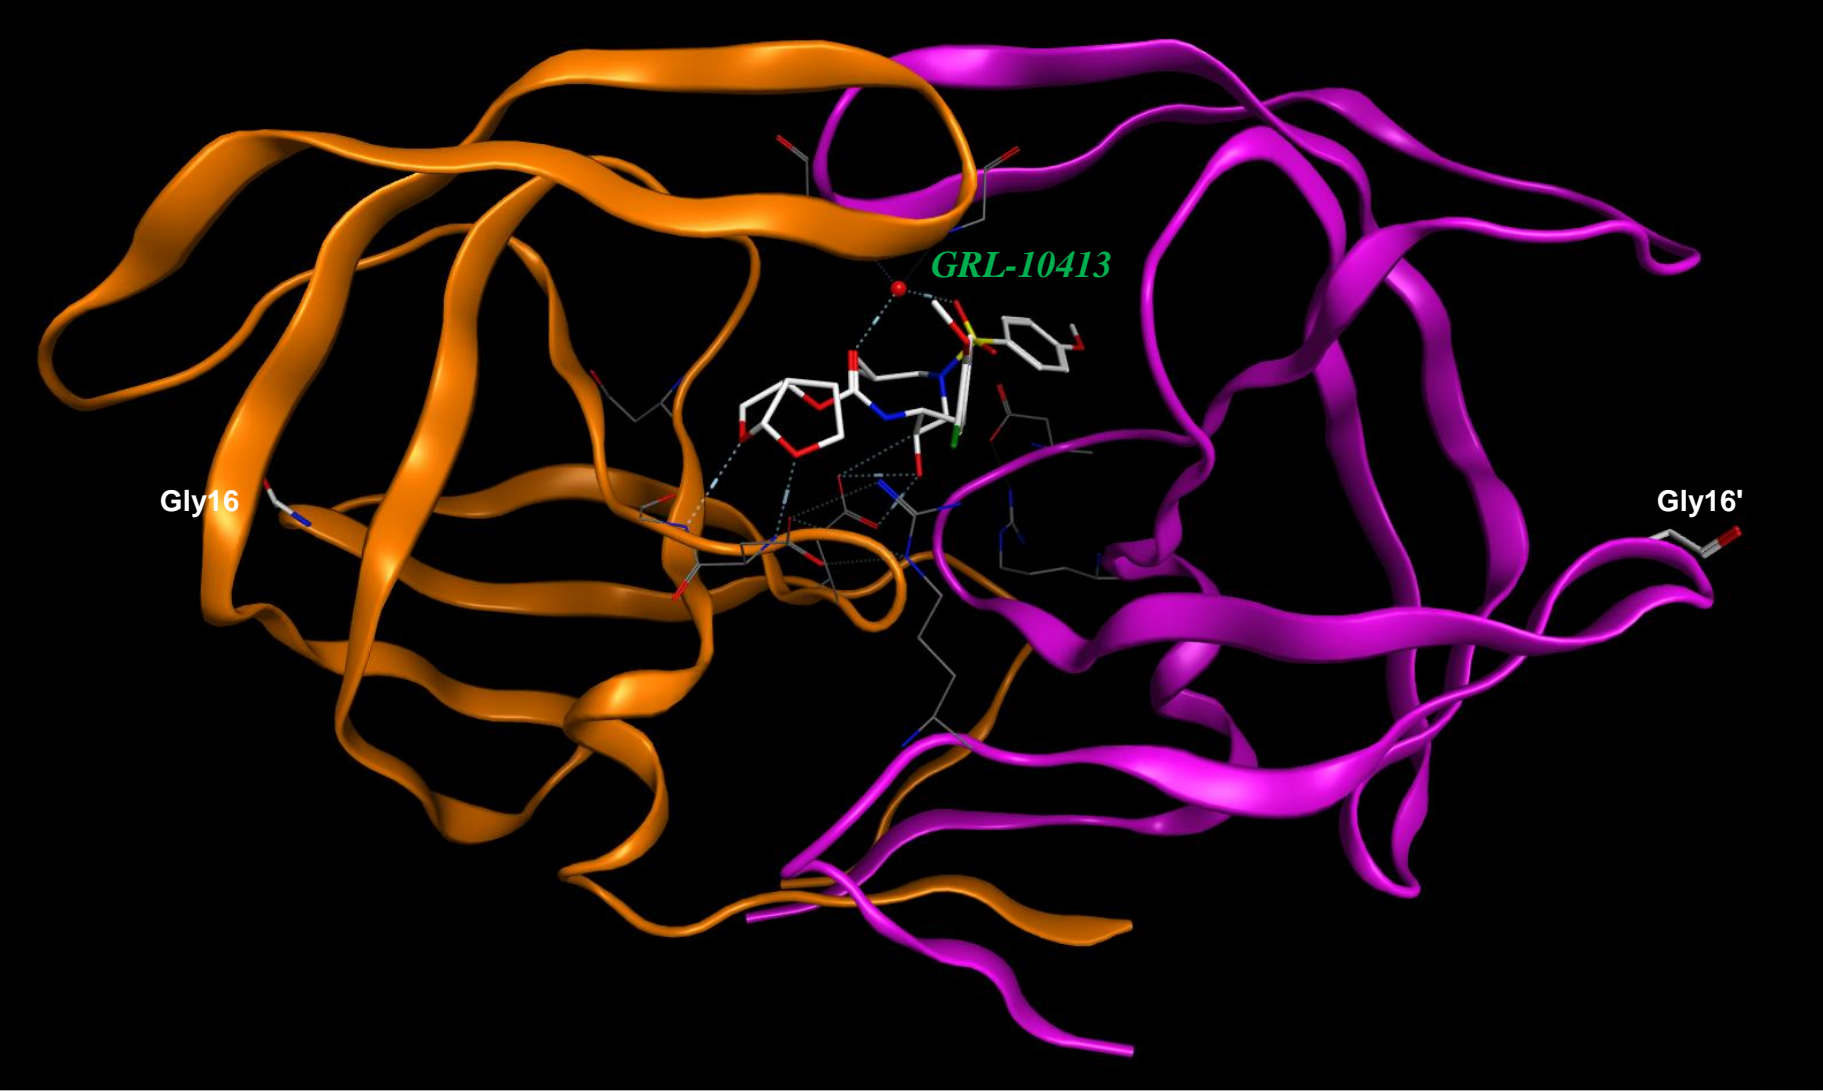

Supplemental Figure S3. Amino acid sequences of the Gag-encoding region of HIV-1<sub>NL4-3</sub> variants selected in the presence of GRL-10413

|         |                                                                                                        |     |
|---------|--------------------------------------------------------------------------------------------------------|-----|
| NL4-3   | MGARASVLSGGELDKWEKIRLRPGGKKQYKCLKHIVWASRELERFAVNPGLLETSEGCRQILGQLQPSLQTGSEELRSLYNTIAVLYCVHQRIDVKDTKEA  | 100 |
| 104 30P | .....                                                                                                  | 100 |
| 104 40P | .....H.....                                                                                            | 100 |
| 104 50P | .....H.....                                                                                            | 100 |
|         | p17   p24                                                                                              |     |
| NL4-3   | LDKIEEEQNKSKKKAQQAAADTGNNNSQVSQNYPIVQNLQGQMVHQAISPRTLNAWVKVVEEKAFSPEVIPMFSAALSEGATPQDLNNTMLNTVGGHQAAQM | 200 |
| 104 30P | .....I                                                                                                 | 200 |
| 104 40P | .....I                                                                                                 | 200 |
| 104 50P | .....I                                                                                                 | 200 |
| NL4-3   | LKETINEEAAEWDRLHPVHAGPIAPGQMREPRGSDIAGTTSTLQEQIGWMTHNPPIPVGEIYKRWIILGLNKIVRMYSPTSILDIRQGPKEPFRDYVDRF   | 300 |
| 104 30P | .....E.....                                                                                            | 300 |
| 104 40P | .....E.....T.....                                                                                      | 300 |
| 104 50P | .....E.....T.....                                                                                      | 300 |
|         | p24   p2                      p2   p7                                                                  |     |
| NL4-3   | YKTLRAEQASQEVKNWMTETLLVQANANPDCKTILKALGPGATLEEMMTACQGVGGPGHKARVIAEAMSQVTNPATIMIQKGNFRNQKRTVKCFNCGKEGH  | 400 |
| 104 30P | .....                                                                                                  | 400 |
| 104 40P | .....                                                                                                  | 400 |
| 104 50P | .....                                                                                                  | 400 |
|         | p7   p1                      p1   p6                                                                   |     |
| NL4-3   | IAKNCRAPRKKGCWKCGKEGHQMKDCTERQANFLGKIWPSHKGRPGNFLQSRPEPTAPPEESFRFGEETTTSPSQQEPIDKELYPLASLRSLFGSDPSSQ   | 500 |
| 104 30P | .....E.....                                                                                            | 500 |
| 104 40P | .....                                                                                                  | 500 |
| 104 50P | .....                                                                                                  | 500 |

Supplemental Table S1. Determination of apparent BBB permeability coefficients of GRL-04810, -05010, and -0739 using a novel *in vitro* model.

| Compound  | Class | Initial luminal tracer concentration ( $\mu\text{M}$ ) | Final abluminal tracer concentration ( $\mu\text{M}$ ) | Papp ( $10^{-6}$ cm/s) |
|-----------|-------|--------------------------------------------------------|--------------------------------------------------------|------------------------|
| GRL-04810 | PI    | 100                                                    | $3.16 \pm 0.48^*$                                      | $47.8 \pm 8.8^*$       |
| GRL-05010 | PI    | 100                                                    | $4.08 \pm 0.65^*$                                      | $61.8 \pm 12.1^*$      |
| GRL-0739  | PI    | 100                                                    | $1.80 \pm 0.66^*$                                      | $27.3 \pm 10.1^*$      |

In the *in vitro* model using a triple co-culture of rat astrocytes, pericytes and monkey endothelial cells, GRL-04810, -05010, or -0739 (all 100  $\mu\text{M}$ ) were added to the luminal interface (termed blood side) of duplicate wells. The mathematical formula used for the calculation of Papp is described in Materials and Methods section. Results show average values  $\pm$  1 S.D. of duplicated determinations. \*All data in this table were previously reported by us and indicated here as references.

Supplemental Table S2. Antiviral activity of GRL-10413 against R5 tropic subtype-A strain or subtype-C strain in PHA-PBMs.

| Virus <sup>a</sup>                       | EC <sub>50</sub> (μM) <sup>b</sup> |               |                 |                 |
|------------------------------------------|------------------------------------|---------------|-----------------|-----------------|
|                                          | GRL-10413                          | APV           | ATV             | DRV             |
| HIV-1 <sub>92UG037</sub> (subtype A, R5) | 0.00032 ± 0.00002                  | 0.051 ± 0.007 | 0.0038 ± 0.0004 | 0.009 ± 0.001   |
| HIV-1 <sub>97ZA003</sub> (subtype C, R5) | 0.00040 ± 0.00003                  | 0.029 ± 0.005 | 0.0028 ± 0.0003 | 0.0055 ± 0.0001 |

<sup>a</sup>R5 denote R5-tropic HIV-1 strain.

<sup>b</sup>The EC<sub>50</sub> (50 % effective concentration) values were determined by using PHA-PBM as target cells and the inhibition of p24 Gag protein production by each drug was used as an endpoint. All assays were conducted in duplicate or triplicate, and the data shown represent mean values (± 1 S.D.) derived from the results of two independent experiments. PHA-PBMs were derived from a single donor in each independent experiment.

Supplemental Table S3. X-ray diffraction data processing details and structure refinement statistics for the X-ray crystal structure of PR<sub>WT</sub> in complex with GRL-10413.

|                                   |              | PR <sub>WT</sub> + GRL-10413                    |
|-----------------------------------|--------------|-------------------------------------------------|
| PDB entry                         |              | 5KAO                                            |
| <b>Data processing parameters</b> |              |                                                 |
| Resolution range (Å)              |              | 50.00 - 1.68                                    |
| Unit cell - a (Å)                 |              | 50.650                                          |
|                                   | b (Å)        | 57.675                                          |
|                                   | c (Å)        | 61.558                                          |
|                                   | $\alpha$ (°) | 90.00                                           |
|                                   | $\beta$ (°)  | 90.00                                           |
|                                   | $\gamma$ (°) | 90.00                                           |
| Space group                       |              | <i>P2<sub>1</sub>2<sub>1</sub>2<sub>1</sub></i> |
| Solvent content (%)               |              | 54.20                                           |
| No. of unique reflections         |              | 39,782                                          |
| Mean ( $I/\sigma(I)$ )            |              | 16.01 <sup>a</sup> (1.8)                        |
| <sup>b</sup> $R_{\text{merge}}$   |              | 0.093 (0.331)                                   |
| Data redundancy                   |              | 2.1 (1.5)                                       |
| Completeness (%)                  |              | 89.4 (75.6)                                     |
| <b>Refinement</b>                 |              |                                                 |
| Resolution range (Å)              |              | 32.37 - 1.80                                    |
| No. of reflections used           |              | 15,506                                          |

|                                                       |        |
|-------------------------------------------------------|--------|
| <sup>c</sup> $R_{cryst}$                              | 0.1838 |
| $R_{free}$                                            | 0.2209 |
| No. of protein atoms per <sup>d</sup> AU              | 1514   |
| No. of ligand atoms per AU                            | 50     |
| No. of water molecules                                | 140    |
| Mean temperature factors - protein ( $\text{\AA}^2$ ) | 18.703 |
| Main chains ( $\text{\AA}^2$ )                        | 16.392 |
| Side chains ( $\text{\AA}^2$ )                        | 21.238 |
| Ligand ( $\text{\AA}^2$ )                             | 16.585 |
| Waters ( $\text{\AA}^2$ )                             | 30.290 |
| RMSD bond lengths ( $\text{\AA}$ )                    | 0.009  |
| RMSD bond angles ( $\text{\AA}$ )                     | 1.203  |
| Ramachandran plot - Most favored (%)                  | 98.46  |
| Additional allowed (%)                                | 1.54   |
| Generously allowed (%)                                | 0      |
| Disallowed (%)                                        | 0      |

---

<sup>a</sup>Values in parentheses are for the highest resolution shell

$$^b R_{merge} = \frac{\sum |I - \langle I \rangle|}{\sum I}$$

$$^c R_{cryst} = \frac{\sum ||F_{obs}| - |F_{calc}||}{\sum |F_{obs}|}$$

<sup>d</sup>AU - Asymmetric unit
